# Supplementary material for: Thin-carbon-layer-enveloped cobalt–iron oxide nanocages as a high-efficiency sulfur container for Li–S batteries
Source: Royal Society of Chemistry journal article supplement (doi:10.1039/d0ta07579e), 2020-01-01
Supplement: d0ta07579e1.pdf [file d0ta07579e1.pdf]

## Supplementary information

### Thin Carbon Layer Enveloped Cobalt-Iron Oxide Nanocages as High-Efficiency Sulfur Container for Li-S Batteries

Liang-Liang Gu<sup>a</sup>, Jian Gao<sup>b</sup>, Chuang Wang<sup>a</sup>, Sheng-You Qiu<sup>a</sup>, Ke-Xin Wang<sup>a</sup>, Xiao-Tian Gao<sup>a</sup>, Ke-Ning Sun<sup>c</sup>, Peng-Jian Zuo<sup>a\*</sup> and Xiao-Dong Zhu<sup>ab\*</sup>

<sup>a</sup>. School of Chemistry and Chemical Engineering, Harbin Institute of Technology, Harbin 150001, China. E-mail: zuopj@hit.edu.cn (P.-J. Zuo); zxd9863@163.com (X.-D. Zhu).

<sup>b</sup>. College of Chemical Engineering, Qingdao University of Science & Technology, Qingdao 266042, China. E-mail: xiao-dong\_zhu@qust.edu.cn (X.-D. Zhu).

<sup>c</sup>. State Key Laboratory of Urban Water Resource and Environment, Harbin Institute of Technology, Harbin 150090, China.

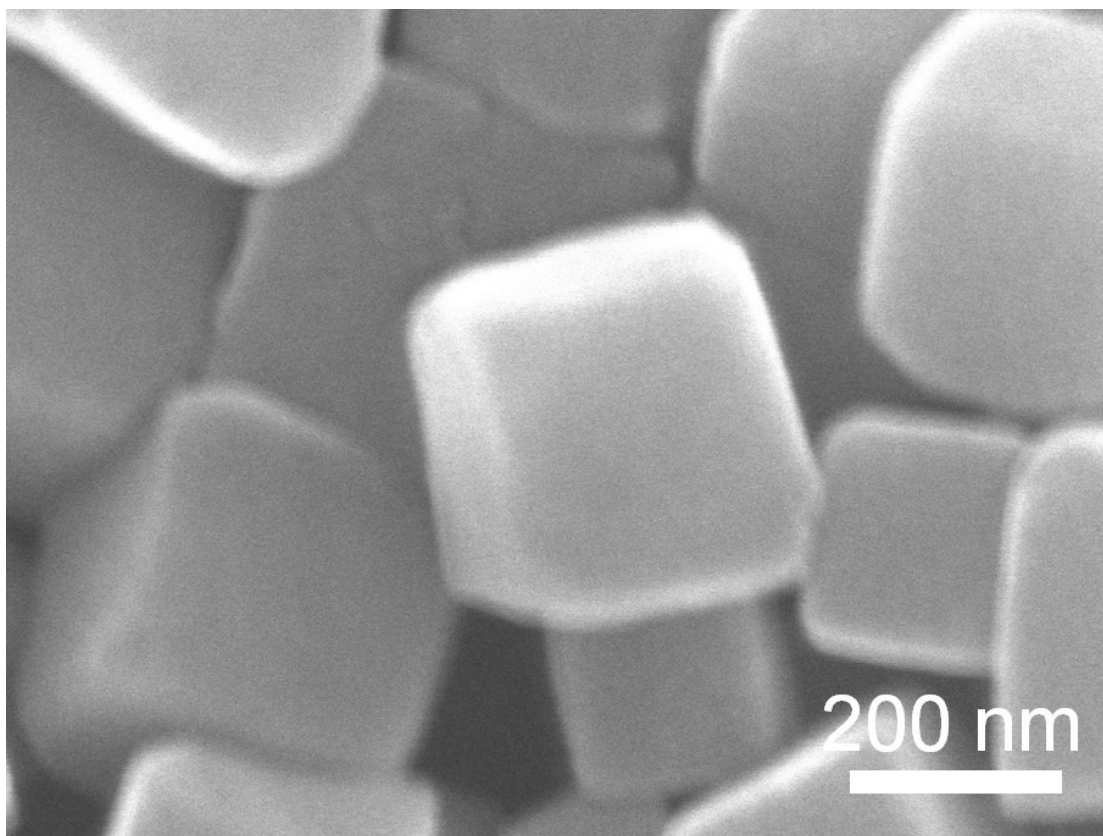

Fig. S1 High magnification SEM image of the Co-Fe PBA precursor.

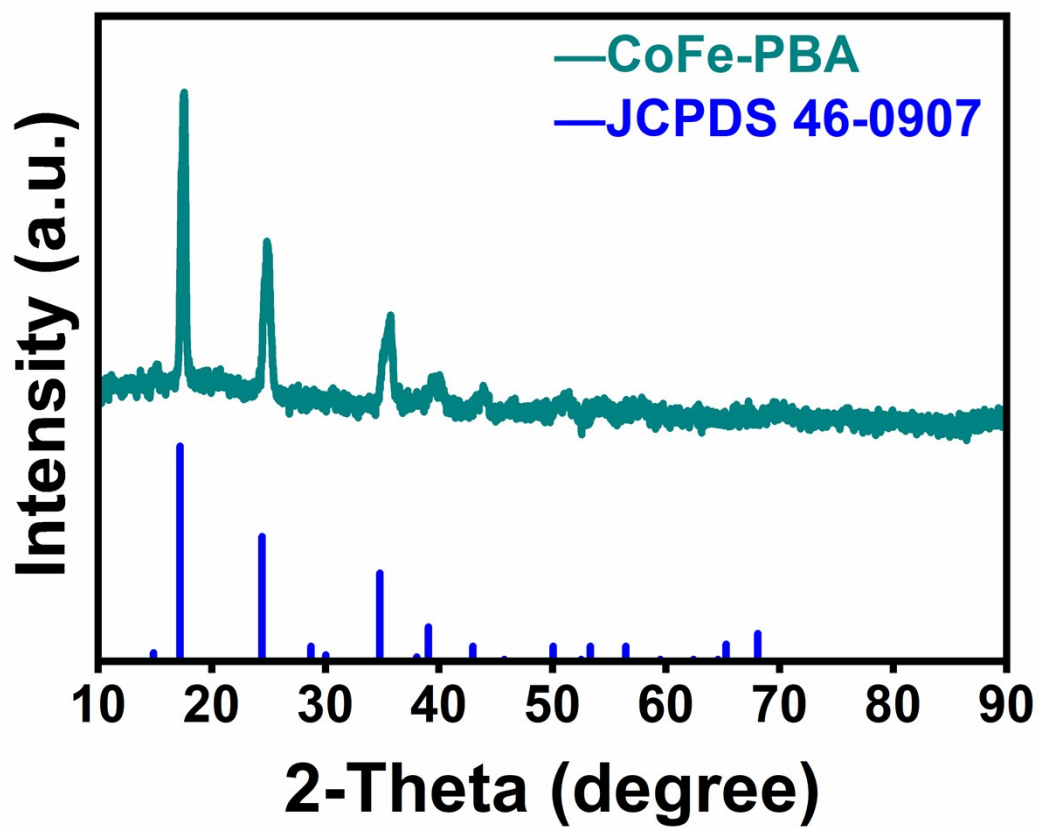

Fig. S2 XRD pattern of Co-Fe PBA precursor.

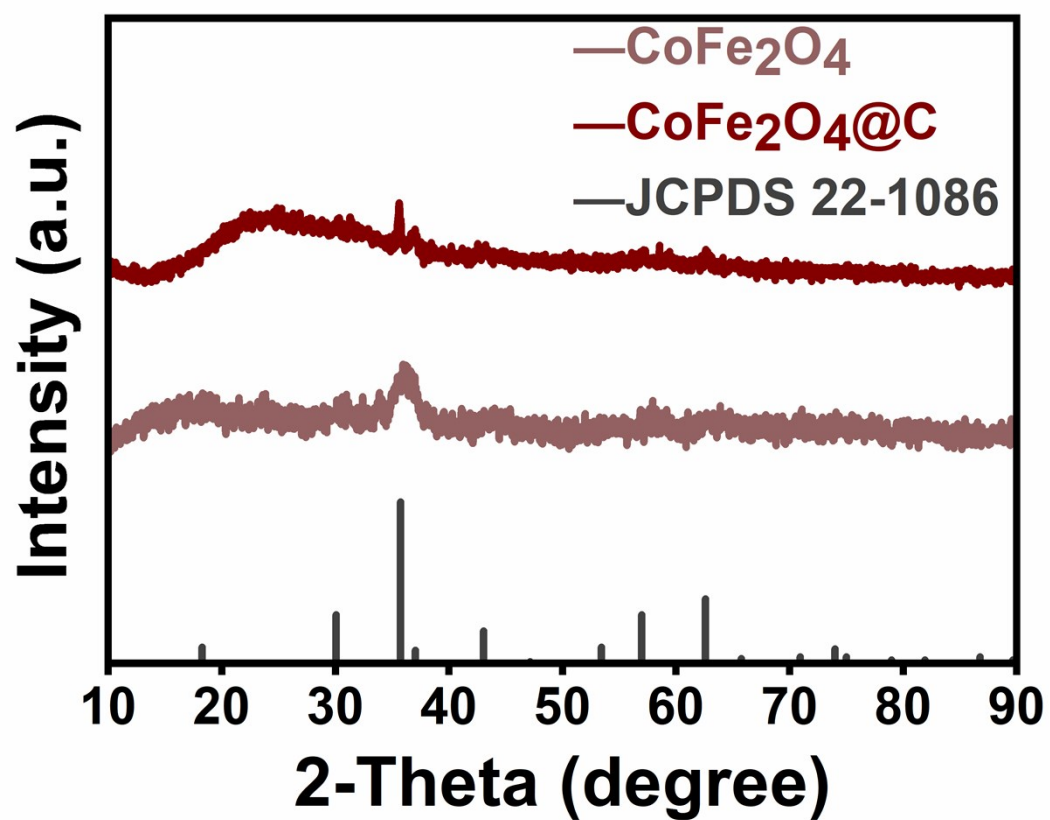

Fig. S3 XRD patterns of CoFe<sub>2</sub>O<sub>4</sub> and CoFe<sub>2</sub>O<sub>4</sub>@C.

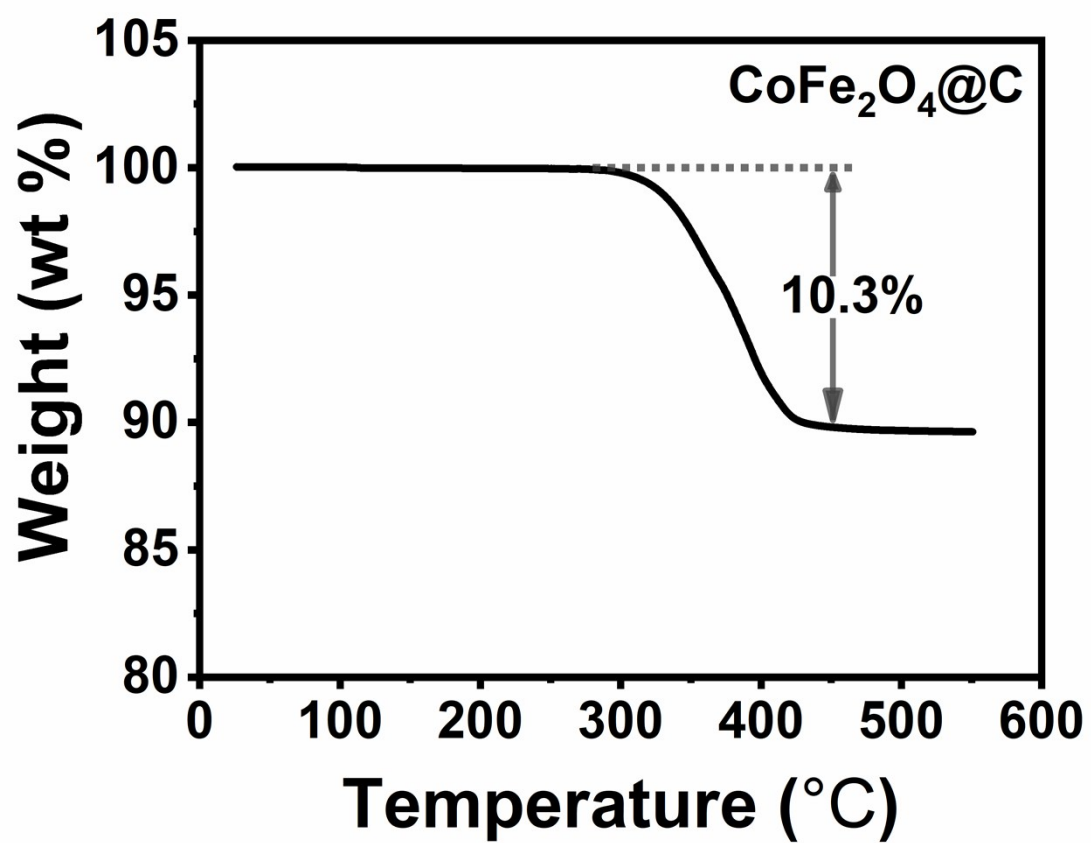

Fig. S4 TGA curve of CoFe<sub>2</sub>O<sub>4</sub>@C under air atmosphere.

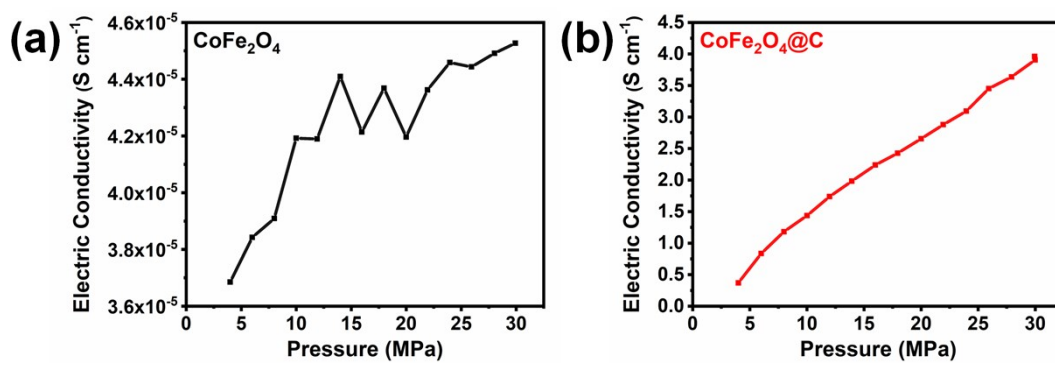

Fig. S5 the electrical conductivity of CoFe<sub>2</sub>O<sub>4</sub> and CoFe<sub>2</sub>O<sub>4</sub>@C.

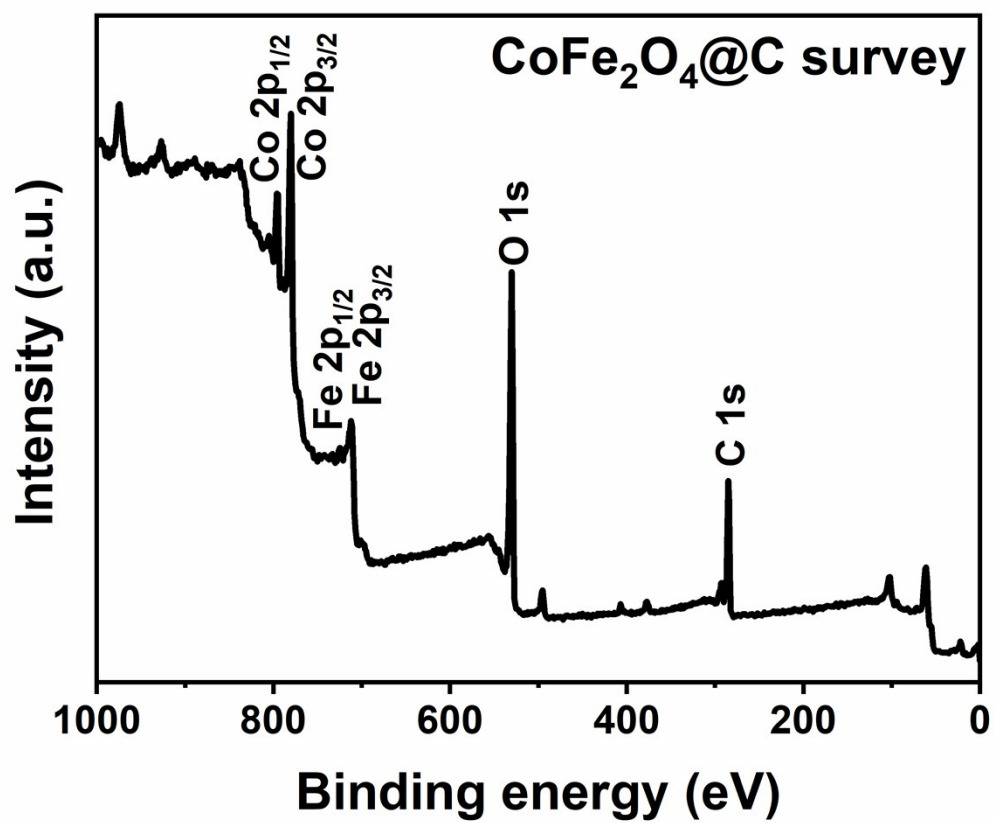

Fig. S6 XPS wide-scan survey of CoFe<sub>2</sub>O<sub>4</sub>@C.

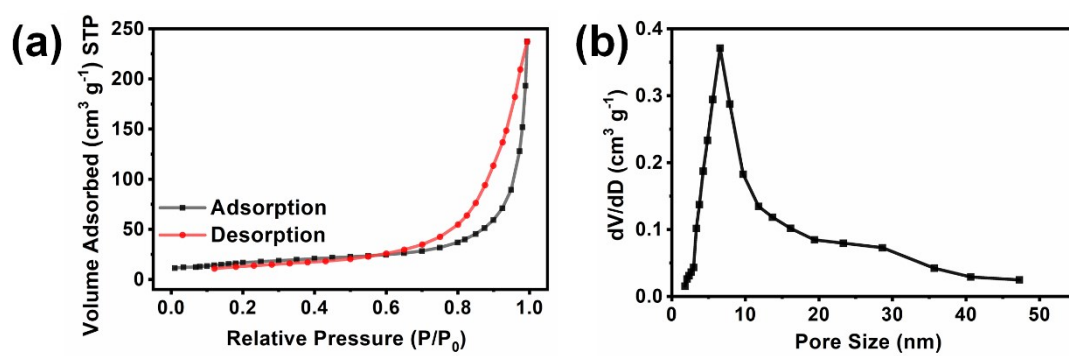

Fig. S7 Nitrogen adsorption-desorption isotherms and pore size distribution of CoFe<sub>2</sub>O<sub>4</sub>@C.



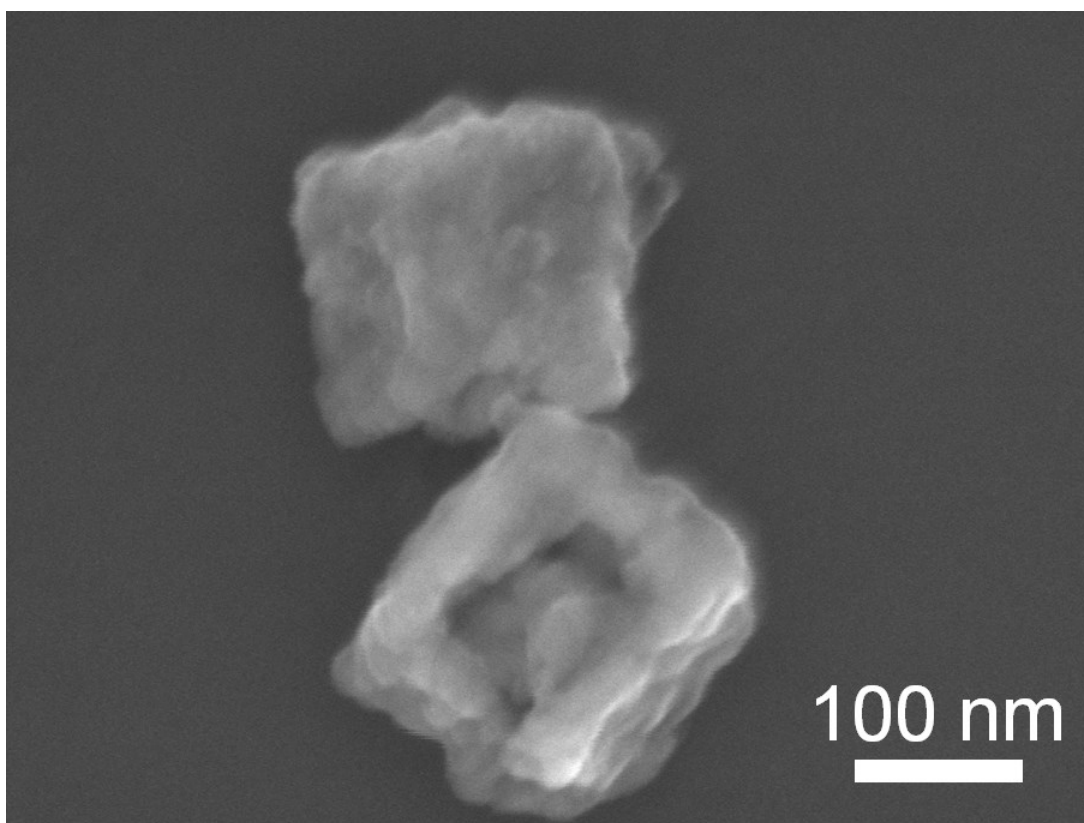

Fig. S8 SEM image of the S/CoFe<sub>2</sub>O<sub>4</sub>@C composite.

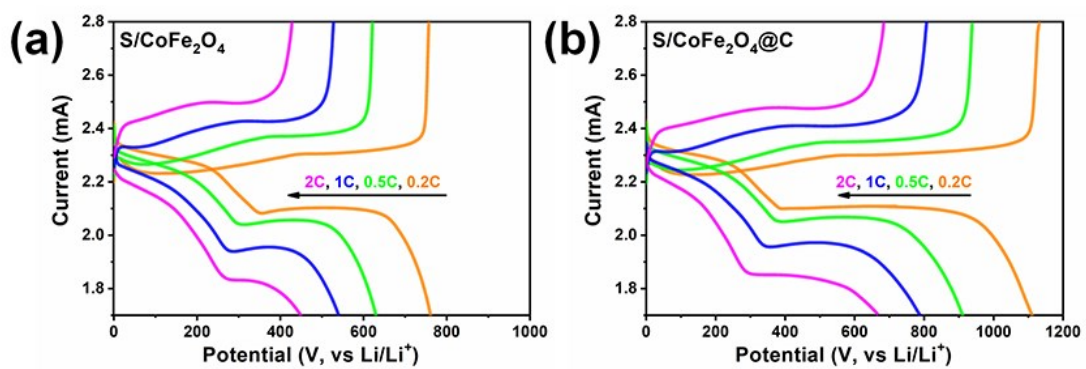

Fig. S9 Discharge/charge profiles at different rates. a) S/CoFe<sub>2</sub>O<sub>4</sub> electrode. b) S/CoFe<sub>2</sub>O<sub>4</sub>@C electrode.

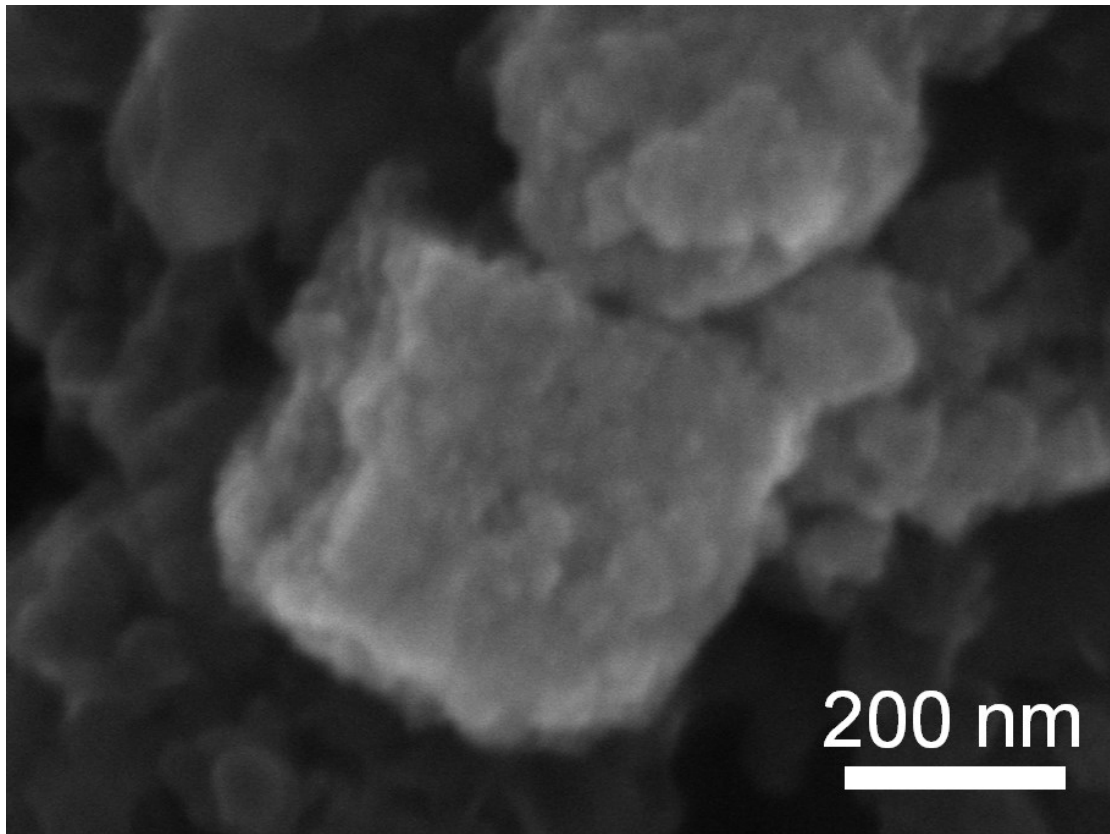

Fig. S10 SEM image of the S/CoFe<sub>2</sub>O<sub>4</sub>@C composite after 500 cycles at 2 C.

Table S1: The slope of linear fitting equation for S/CoFe<sub>2</sub>O<sub>4</sub> and S/CoFe<sub>2</sub>O<sub>4</sub>@C electrodes

| Slope (A (V s <sup>-1</sup> ) <sup>-0.5</sup> ) | A (cathodic peak) | B (cathodic peak) | C (anodic peak) |
|-------------------------------------------------|-------------------|-------------------|-----------------|
| S/CoFe <sub>2</sub> O <sub>4</sub>              | 0.01298           | 0.01922           | 0.04446         |
| S/CoFe <sub>2</sub> O <sub>4</sub> @C           | 0.02358           | 0.03225           | 0.06015         |

Table S2: The comparison of EIS fitting results for S/CoFe<sub>2</sub>O<sub>4</sub> and S/CoFe<sub>2</sub>O<sub>4</sub>@C electrodes

|                                       | $R_{\Omega}$ | $R_{int}$ | $R_{ct}$ |
|---------------------------------------|--------------|-----------|----------|
| S/CoFe <sub>2</sub> O <sub>4</sub>    | 6.1          | 43.2      | 153.9    |
| S/CoFe <sub>2</sub> O <sub>4</sub> @C | 4.5          | 34.1      | 100.8    |
